# Supplementary material for: Effects of Exercise Modalities on Arterial Stiffness and Wave Reflection: A Systematic Review and Meta-Analysis of Randomized Controlled Trials
Source: PubMed Central journal article supplement (PMC4198209; doi:10.1371/journal.pone.0110034), 2014-10-15
Supplement: pone.0110034.s006.pdf [file pone.0110034.s006.pdf]

**Table S2:** Further characteristics of resistance/combined exercise intervention studies included in the meta-analysis

| Author                        | Country     | Study Design | Arterial Stiffness | Compliance % | Instrument           | Type of Exercise                                                                                                                                                                                                                    |
|-------------------------------|-------------|--------------|--------------------|--------------|----------------------|-------------------------------------------------------------------------------------------------------------------------------------------------------------------------------------------------------------------------------------|
| <b>Resistance exercise</b>    |             |              |                    |              |                      |                                                                                                                                                                                                                                     |
| Beck et al. 2013 [1]          | USA         | Parallel     | PWV, PWA           | 100%         | SphygmaCor/AT        | Leg extension, leg curl, leg press, lat pull down, chest press, overhead press, biceps curl                                                                                                                                         |
| Cortez-Cooper et al. 2008 [2] | USA         | Parallel     | PWV, PWA           | 87%          | US/AT                | Seated chest press, horizontal leg press, shoulder press, abdominal crunches, seated hamstring curls, seated row, seated calf raises, low back extension, triceps curls, biceps dumbbell                                            |
| Croymans et al. 2014 [3]      | USA         | Parallel     | PWV, PWA           | 99%          | SphygmaCor/AT        | Dumbbells, squats, cable row, dumbbell front lunge, dumbbell row, dumbbell triceps extension and dumbbell biceps curls, chest press, overhead press, abdominal crunches                                                             |
| Heffernan et al. 2013 [4]     | USA         | Parallel     | PWA                | 90%          | SphygmaCor/AT        | Chest press, latissimus dorsi pulldown, back row, biceps curls, leg press, leg extension, leg curl                                                                                                                                  |
| Ho et al. 2012 [5]            | Australia   | Parallel     | PWA                | 67-74%       | SphygmaCor/AT        | Leg press, leg curl, leg extension, bench press, rear deltoid row                                                                                                                                                                   |
| Miyachi et al. 2004 [6]       | Japan       | Parallel     | PWA                | 100%         | US/AT                | Leg extension, seated chest press, leg curls, lateral rows, squat, and sit-up                                                                                                                                                       |
| Okamoto et al. 2006 ERT [7]   | Japan       | Parallel     | PWV                |              | Form PWV/ABI         | Arm curls                                                                                                                                                                                                                           |
| Okamoto et al. 2006 CRT [7]   | Japan       | Parallel     | PWV                |              | Form PWV/ABI         | Arm curls                                                                                                                                                                                                                           |
| Okamoto et al. 2008 [8]       | Japan       | Parallel     | PWV                |              | Form PWV/ABI         | Chest press, arm curl, lateral pull down, seated rows, shoulder press, leg extension, leg curls, leg press and sit-up                                                                                                               |
| Okamoto et al. 2009 UL [9]    | Japan       | Parallel     | PWV                |              | Form PWV/ABI         | Chest press, arm curls, seated rows, shoulder presses, lat pull down                                                                                                                                                                |
| Okamoto et al. 2009 LL [9]    | Japan       | Parallel     | PWV                |              | Form PWV/ABI         | Leg press, squats, seated calf raises, leg extensions and leg curls                                                                                                                                                                 |
| Okamoto et al. 2009 ERT [10]  | Japan       | Parallel     | PWV                |              | Form PWV/ABI         | Chest press or arm curls, seated rows, leg curls, leg press and sit-up                                                                                                                                                              |
| Okamoto et al. 2009 CRT [10]  | Japan       | Parallel     | PWV                |              | Form PWV/ABI         | Chest press or arm curls, seated rows, leg curls, leg press and sit-up                                                                                                                                                              |
| Okamoto et al. 2011 [11]      | Japan       | Parallel     | PWV                |              | Form PWV/ABI         | Chest press, arm curls, seated rows, lateral pull down, leg press, leg extension, leg curl and sit-ups                                                                                                                              |
| Okamoto et al. 2013 ALRT [12] | Japan       | Parallel     | PWV                |              | Form PWV/ABI         | Chest press, arm curls, seated rows, leg curls, leg press                                                                                                                                                                           |
| Okamoto et al. 2013 BLRT [12] | Japan       | Parallel     | PWV                |              | Form PWV/ABI         | Chest press, arm curls, seated rows, leg curls, leg press                                                                                                                                                                           |
| Yoshizawa et al. 2009 [13]    | Japan       | Parallel     | PWV                |              | AT                   | Leg curl, leg press, hip abduction, hip flexion, vertical press and sit-ups                                                                                                                                                         |
| <b>Combined exercise</b>      |             |              |                    |              |                      |                                                                                                                                                                                                                                     |
| Cortez-Cooper et al. 2008 [2] | USA         | Parallel     | PWV, PWA           | 95%          | US/AT                | 3days: Seated chest press, horizontal leg press, shoulder press, abdominal crunches, seated hamstring curls, seated row, seated calf raises, low back extension, triceps curls, biceps dumbbell and other 2 days walking or cycling |
| Dobrosielski et al. 2012 [14] | USA         | Parallel     | PWV                | 92%          | AT                   | Resistance exercise (multi-station machine) and aerobic exercise cycling or stairstepper                                                                                                                                            |
| Figuroa et al. 2011[15]       | South Korea | Parallel     | PWV                |              | Photoplethysmography | Chest press, leg press, shoulder press, abdominal crunches, leg curls, leg extensions, low back extensions, biceps curls and triceps extension followed by 20 minute of treadmill walking                                           |
| Ho et al. 2012 [5]            | Australia   | Parallel     | PWA                | 67-74%       | SphygmaCor/AT        | Leg press, leg curl, leg extension, bench press, rear deltoid row and treadmill                                                                                                                                                     |
| Kawasaki et al. 2011 [16]     | Japan       | Parallel     | PWV                | 92%          | Photoplethysmography | Land-based muscle strength groups, swimming and cycling for 2 hours                                                                                                                                                                 |
| Loimaala et al. 2009 [17]     | Finland     | Parallel     | PWV                | 75%          | Photoplethysmography | Twice weekly aerobic training (jogging or walking) and twice weekly resistance training of large muscle groups                                                                                                                      |
| Miura et al. 2008 1DW [18]    | Japan       | Parallel     | PWV                |              | BP-203RPEII          | Rubber tubes and/or lightweight dumbbell and walking or running                                                                                                                                                                     |
| Miura et al. 2008 2DW [18]    | Japan       | Parallel     | PWV                |              | BP-203RPEII          | Rubber tubes and/or lightweight dumbbell and walking or running                                                                                                                                                                     |
| Ohta et al. 2012 [19]         | Japan       | Parallel     | PWV                | 85%          | Photoplethysmography | Bench step exercise                                                                                                                                                                                                                 |
| Okamoto et al. 2007 BRT [20]  | Japan       | Parallel     | PWV                |              | Form PWV/ABI         | Running (aerobic) and resistance (chest and shoulder press, arm curls, seated rows, leg curls, leg press and sit-up)                                                                                                                |
| Okamoto et al. 2007 ART [20]  | Japan       | Parallel     | PWV                |              | Form PWV/ABI         | Running (aerobic) and resistance (chest and shoulder press, arm curls, seated rows, leg curls, leg press and sit-up)                                                                                                                |
| Stewart et al. 2005 [21]      | USA         | Parallel     | PWV                | 88%          |                      | Aerobic (treadmill, cycling, stairstepper) and resistance (latissimus dorsi pull down, leg extension, leg press, leg curl, bench press, shoulder press, seated row)                                                                 |
| Wong et al. 2014 [22]         | USA         | Parallel     | PWV, PWA           |              | AT                   | Stretching exercise of major muscle groups                                                                                                                                                                                          |

## References

1. Beck DT, Martin JS, Casey DP, Braith RW: Exercise training reduces peripheral arterial stiffness and myocardial oxygen demand in young prehypertensive subjects. *American Journal of Hypertension* 2013, 26(9):1093-1102.
2. Cortez-Cooper MY, Anton MM, Devan AE, Neidre DB, Cook JN, Tanaka H: The effects of strength training on central arterial compliance in middle-aged and older adults. *European Journal of Cardiovascular Prevention & Rehabilitation* 2008, 15(2):149-155.
3. Croymans DM, Krell SL, Oh CS, Katiraie M, Lam CY, Harris RA, Roberts CK: Effects of resistance training on central blood pressure in obese young men. *J Hum Hypertens* 2014, 28(3):157-164.
4. Heffernan KS, Yoon ES, Sharman JE, Davies JE, Shih YT, Chen CH, Fernhall B, Jae SY: Resistance exercise training reduces arterial reservoir pressure in older adults with prehypertension and hypertension. *Hypertension Research - Clinical & Experimental* 2013, 36(5):422-427.
5. Ho SS, Radavelli-Bagatini S, Dhaliwal SS, Hills AP, Pal S: Resistance, aerobic, and combination training on vascular function in overweight and obese adults. *Journal of Clinical Hypertension* 2012, 14(12):848-854.
6. Miyachi M, Kawano H, Sugawara J, Takahashi K, Hayashi K, Yamazaki K, Tabata I, Tanaka H: Unfavorable effects of resistance training on central arterial compliance: a randomized intervention study. *Circulation* 2004, 110(18):2858-2863.
7. Okamoto T, Masuhara M, Ikuta K: Effects of eccentric and concentric resistance training on arterial stiffness. *Journal of Human Hypertension* 2006, 20(5):348-354.
8. Okamoto T, Masuhara M, Ikuta K: Effects of low-intensity resistance training with slow lifting and lowering on vascular function. *J Hum Hypertens* 2008, 22(7):509-511.
9. Okamoto T, Masuhara M, Ikuta K: Upper but not lower limb resistance training increases arterial stiffness in humans. *European Journal of Applied Physiology* 2009, 107(2):127-134.
10. Okamoto T, Masuhara M, Ikuta K: Effects of muscle contraction timing during resistance training on vascular function. *Journal of Human Hypertension* 2009, 23(7):470-478.
11. Okamoto T, Masuhara M, Ikuta K: Effect of low-intensity resistance training on arterial function. *European Journal of Applied Physiology* 2011, 111(5):743-748.
12. Okamoto T, Masuhara M, Ikuta K: Low-intensity resistance training after high-intensity resistance training can prevent the increase of central arterial stiffness. *International Journal of Sports Medicine* 2013, 34(5):385-390.
13. Yoshizawa M, Maeda S, Miyaki A, Misono M, Saito Y, Tanabe K, Kuno S, Ajisaka R: Effect of 12 weeks of moderate-intensity resistance training on arterial stiffness: a randomised controlled trial in women aged 32-59 years. *British Journal of Sports Medicine* 2009, 43(8):615-618.
14. Dobrosielski DA, Gibbs BB, Ouyang P, Bonekamp S, Clark JM, Wang NY, Silber HA, Shapiro EP, Stewart KJ: Effect of exercise on blood pressure in type 2 diabetes: a randomized controlled trial. *Journal of General Internal Medicine* 2012, 27(11):1453-1459.
15. Figueroa A, Park SY, Seo DY, Sanchez-Gonzalez MA, Baek YH: Combined resistance and endurance exercise training improves arterial stiffness, blood pressure, and muscle strength in postmenopausal women. *Menopause* 2011, 18(9):980-984.
16. Kawasaki T, Sullivan CV, Ozo N, Higaki H, Kawasaki J: A long-term, comprehensive exercise program that incorporates a variety of physical activities improved the blood pressure, lipid and glucose metabolism, arterial stiffness, and balance of middle-aged and elderly Japanese. *Hypertension Research - Clinical & Experimental* 2011, 34(9):1059-1066.
17. Loimaala A, Groundstroem K, Rinne M, Nenonen A, Huhtala H, Parkkari J, Vuori I: Effect of long-term endurance and strength training on metabolic control and arterial elasticity in patients with type 2 diabetes mellitus. *American Journal of Cardiology* 2009, 103(7):972-977.

18. Miura H, Nakagawa E, Takahashi Y: Influence of group training frequency on arterial stiffness in elderly women. *European Journal of Applied Physiology* 2008, 104(6):1039-1044.
19. Ohta M, Hirao N, Mori Y, Takigami C, Eguchi M, Tanaka H, Ikeda M, Yamato H: Effects of bench step exercise on arterial stiffness in post-menopausal women: contribution of IGF-1 bioactivity and nitric oxide production. *Growth Hormone & Igf Research* 2012, 22(1):36-41.
20. Okamoto T, Masuhara M, Ikuta K: Combined aerobic and resistance training and vascular function: effect of aerobic exercise before and after resistance training. *Journal of Applied Physiology* 2007, 103(5):1655-1661.
21. Stewart KJ, Bacher AC, Turner KL, Fleg JL, Hees PS, Shapiro EP, Tayback M, Ouyang P: Effect of exercise on blood pressure in older persons: A randomized controlled trial. *Archives of Internal Medicine* 2005, 165(7):756-762.
22. Wong A, Figueroa A: Eight weeks of stretching training reduces aortic wave reflection magnitude and blood pressure in obese postmenopausal women. *Journal of Human Hypertension* 2014, 28(4):246-250.
