# Supplementary material for: Effects of Exercise Modalities on Arterial Stiffness and Wave Reflection: A Systematic Review and Meta-Analysis of Randomized Controlled Trials
Source: PubMed Central journal article supplement (PMC4198209; doi:10.1371/journal.pone.0110034), 2014-10-15
Supplement: pone.0110034.s007.pdf [file pone.0110034.s007.pdf]

**Table S3:** Subgroup analyses of the effects aerobic exercise on augmentation index using a random-effects model

|                                      | Trials*<br>(No.) | AIx (%) | 95% CI           | <i>I</i> (%) | <i>P</i> Value** |
|--------------------------------------|------------------|---------|------------------|--------------|------------------|
| Age of participants (years)          |                  |         |                  |              | <b>0.18</b>      |
| ≤ 50 years                           | 7 (215)          | -4.01   | -6.82 to -1.18   | 61.6         |                  |
| > 50 years                           | 9 (223)          | -0.98   | -5.47 to 3.50    | 86.5         |                  |
| Body mass index (kg/m <sup>2</sup> ) |                  |         |                  |              | <b>0.86</b>      |
| ≤ 24.9                               | 3 (76)           | -3.86   | -11.17 to 3.43   | 61.6         |                  |
| ≥ 25                                 | 13 (362)         | -2.46   | -5.56 to 0.63    | 83.6         |                  |
| Baseline systolic pressure (mmHg)    |                  |         |                  |              | <b>0.41</b>      |
| ≤ 120                                | 8 (228)          | -2.09   | -5.68 to 1.50    | 86.6         |                  |
| > 120                                | 8 (210)          | -4.99   | -6.54 to -3.45   | 0            |                  |
| Baseline diastolic pressure (mmHg)   |                  |         |                  |              | <b>0.81</b>      |
| ≤ 80                                 | 13 (354)         | -2.56   | -5.43 to 0.30    | 84.6         |                  |
| > 80                                 | 3 (84)           | -3.65   | -8.80 to 1.49    | 0            |                  |
| Baseline augmentation index (%)      |                  |         |                  |              | <b>0.99</b>      |
| ≤ 11                                 | 7 (203)          | -2.68   | -6.52 to 1.15    | 88.5         |                  |
| > 11                                 | 8 (202)          | -3.49   | -5.91 to -1.08   | 14.3         |                  |
| Intensity of exercise (METs)         |                  |         |                  |              | <b>0.47</b>      |
| ≤ 7                                  | 7 (186)          | -1.88   | (-7.26 to -3.50) | 64.5         |                  |
| > 7                                  | 8 (234)          | -2.72   | (-5.12 to -0.31) | 53           |                  |
| Duration of the study (weeks)        |                  |         |                  |              | <b>0.38</b>      |
| ≤ 10                                 | 4 (101)          | -2.80   | -10.49 to 4.88   | 78           |                  |
| > 10                                 | 12 (337)         | -3.15   | -5.14 to -1.15   | 53           |                  |
| Quality of studies                   |                  |         |                  |              | <b>0.21</b>      |
| < 3                                  | 7 (188)          | -1.48   | -5.26 to 2.29    | 75.2         |                  |
| ≥ 3                                  | 9 (250)          | -4.79   | -6.01 to -3.59   | 0            |                  |

\*Number of trials or subgroups (number of participants)

\*\**P* value for the meta-regression analyses between subgroups. WMD: weighted mean difference
